# Supplementary material for: The Novel Antitumor Compound HCA Promotes Glioma Cell Death by Inducing Endoplasmic Reticulum Stress and Autophagy
Source: MDPI journal article supplement (doi:10.3390/cancers13174290), 2021-08-26
Supplement: s1 [file s1]

# SUPPLEMENTARY TABLE

**Table S1.** Efficacy of HCA against different human glioma cell lines. IC<sub>50</sub> values for HCA against glioma cell proliferation after a 24, 48 and 72 h treatment (mean ± SEM from 3 independent experiments performed in quadruplet). HCA: 2-hydroxycervonic acid.

| Cell line       | Time (h) | IC <sub>50</sub> HCA (μM) |
|-----------------|----------|---------------------------|
| <b>SF-268</b>   | 24       | 148 ± 7                   |
|                 | 48       | 115 ± 8                   |
|                 | 72       | 104 ± 10                  |
| <b>SNB-19</b>   | 24       | 175 ± 5                   |
|                 | 48       | 132 ± 6                   |
|                 | 72       | 130 ± 8                   |
| <b>SNB-75</b>   | 24       | 138 ± 9                   |
|                 | 48       | 120 ± 10                  |
|                 | 72       | 111 ± 10                  |
| <b>U-251 MG</b> | 24       | 147 ± 4                   |
|                 | 48       | 99 ± 7                    |
|                 | 72       | 89 ± 10                   |

# SUPPLEMENTARY FIGURES

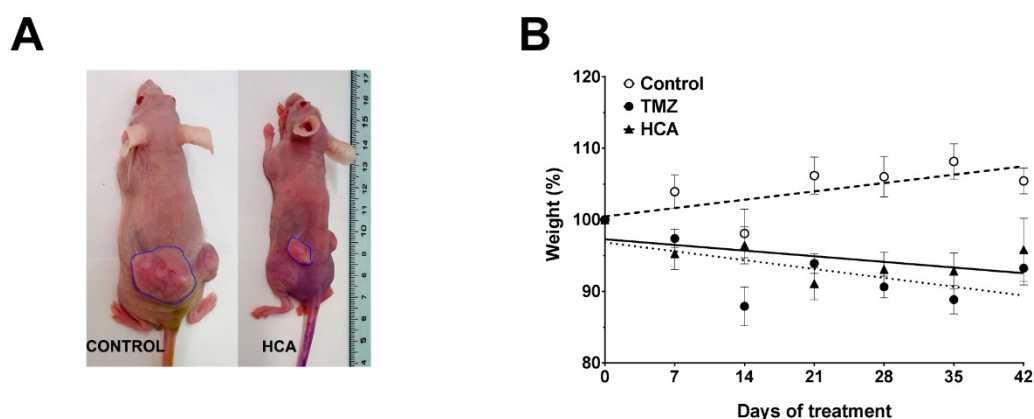

**Figure S1.** HCA efficacy in mice (A) Representative photographs of mice that received a xenograft of U-118 MG cells and treated with the vehicle alone (Control) or HCA (200 mg/kg, p.o., 42 days). (B) The weight of the mice was measured during the treatment (mean ± SEM:  $n = 22$  for the controls,  $n = 19$  for HCA,  $n = 8$  for TMZ). HCA: 2-hydroxycervonic acid; TMZ: temozolomide.

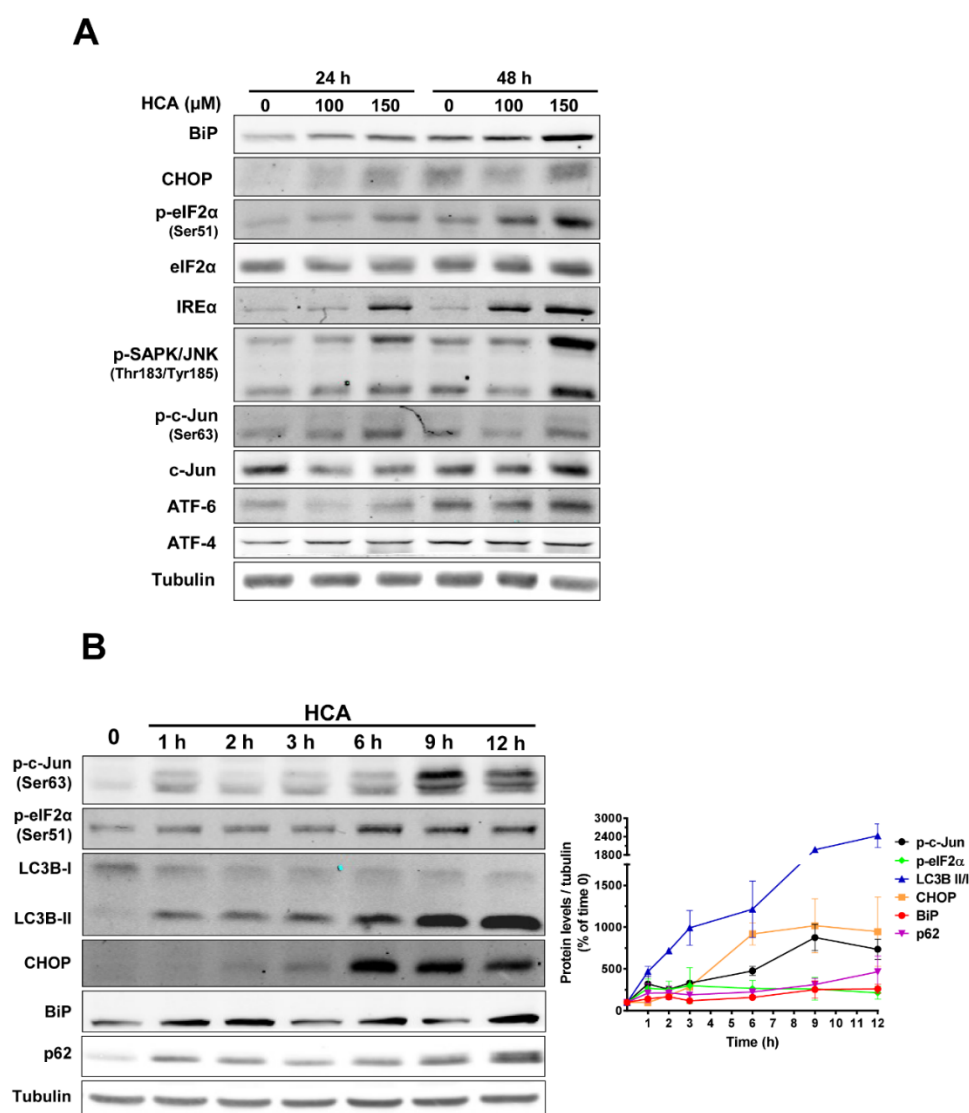

**Figure S2.** HCA activates ER stress/UPR signaling pathways in SF-295 GBM cells. (A) Representative immunoblots of the effect of HCA on SF-295 cells (100 or 150  $\mu\text{M}$  for 24 or 48 h) on eIF2 $\alpha$  and c-Jun phosphorylation, BiP, CHOP, ATF6, ATF4 and IRE $\alpha$  proteins, using tubulin as a loading control. (B) SF-295 cells were treated with 200  $\mu\text{M}$  HCA for 1, 2, 3, 6, 9 and 12 h, and protein levels or phosphorylation were assessed (left) and quantified in immunoblots (mean  $\pm$  SEM of three independent experiments, right). HCA: 2-hydroxycervonic acid; ATF: Activating Transcription Factor; BiP: a.k.a. GRP78, glucose-regulated protein 78; CHOP: a.k.a. DDIT3, DNA Damage Inducible Transcript 3; c-Jun: Jun Proto-Oncogene, AP-1 Transcription Factor Subunit; eIF2 $\alpha$ : Eukaryotic Translation Initiation Factor 2A; IRE $\alpha$ : inositol-requiring enzyme 1; LC3B: a.k.a. ATG8F, Microtubule Associated Protein 1 Light Chain 3 Beta; p62: a.k.a. SQSTM1, Sequestosome 1.

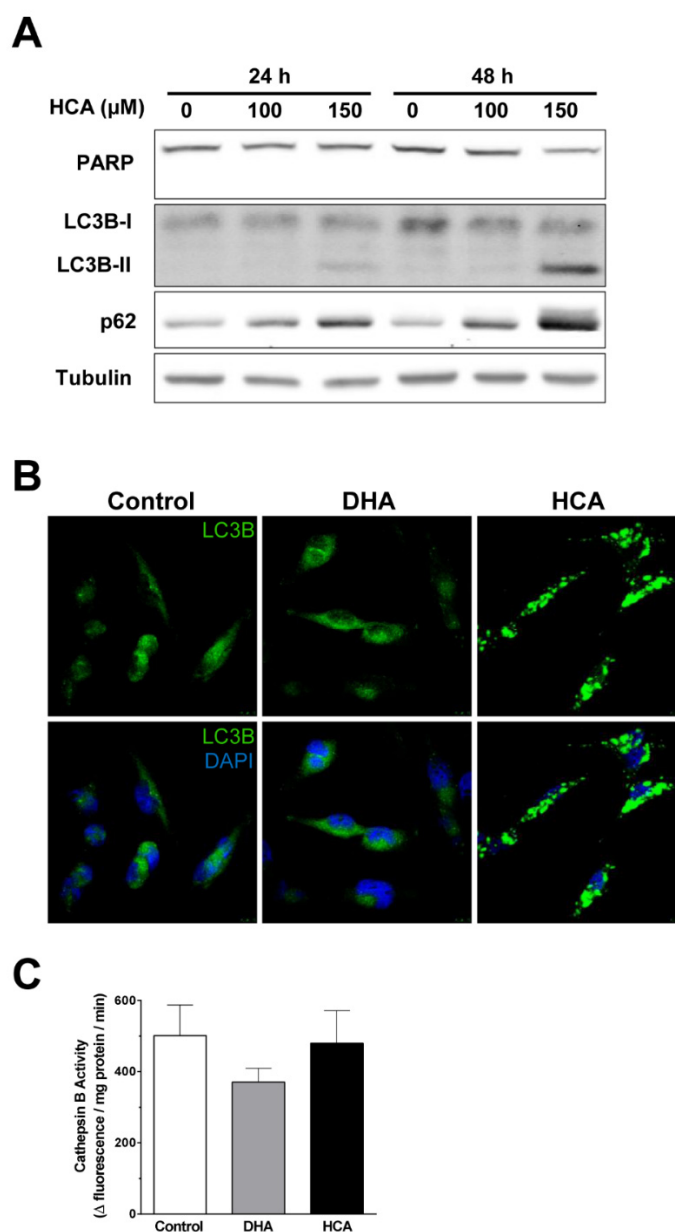

**Figure S3.** HCA induces autophagy in SF-295 GBM cells. **(A)** Representative immunoblots of the effect of HCA (100 or 150  $\mu$ M for 24 or 48 h) on PARP, LC3B and p62 proteins in SF-295 cells, using tubulin as a loading control. **(B)** LC3B immunofluorescence (green) in SF-295 cells treated for 48 h with DHA (100  $\mu$ M) or HCA (150  $\mu$ M), with the nuclei labeled with DAPI. Representative micrographs (single confocal planes) are shown: scale bar, 5  $\mu$ m. **(C)** Cathepsin B activity of U-118 MG cells after treatment with DHA (100  $\mu$ M) or HCA (150  $\mu$ M) for 48 h (bars correspond to the mean  $\pm$  SEM values of 3 independent experiments). HCA: 2-hydroxycervonic acid; DHA: docosahexaenoic acid; LC3B: a.k.a. ATG8F, Microtubule Associated Protein 1 Light Chain 3 Beta; p62: a.k.a. SQSTM1, Sequestosome 1; PARP: Poly(ADP-Ribose) Polymerase.

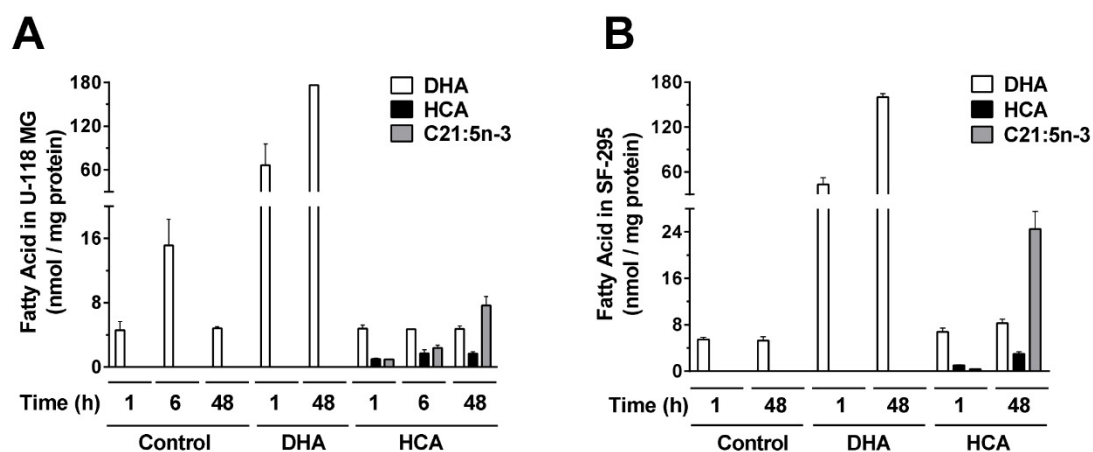

**Figure S4.** Effect of HCA on the fatty acid composition of U-118 MG or SF-295 GBM cells. (A) U-118 MG cells were maintained in the presence or absence of HCA (150  $\mu$ M) or DHA (100  $\mu$ M) for 1, 6 or 48 h, and the lipids were extracted from the cells. (B) SF-295 cells were treated as in (A). The levels of DHA, HCA and C21:5n-3 were quantified by GC, and identified by comparison to the standards (all the bars correspond to the mean  $\pm$  SEM values of at least 3 independent experiments). Figure 2. HCA: 2-hydroxycervonic acid; DHA: docosahexaenoic acid; C21:5n-3: heneicosapentaenoic acid.

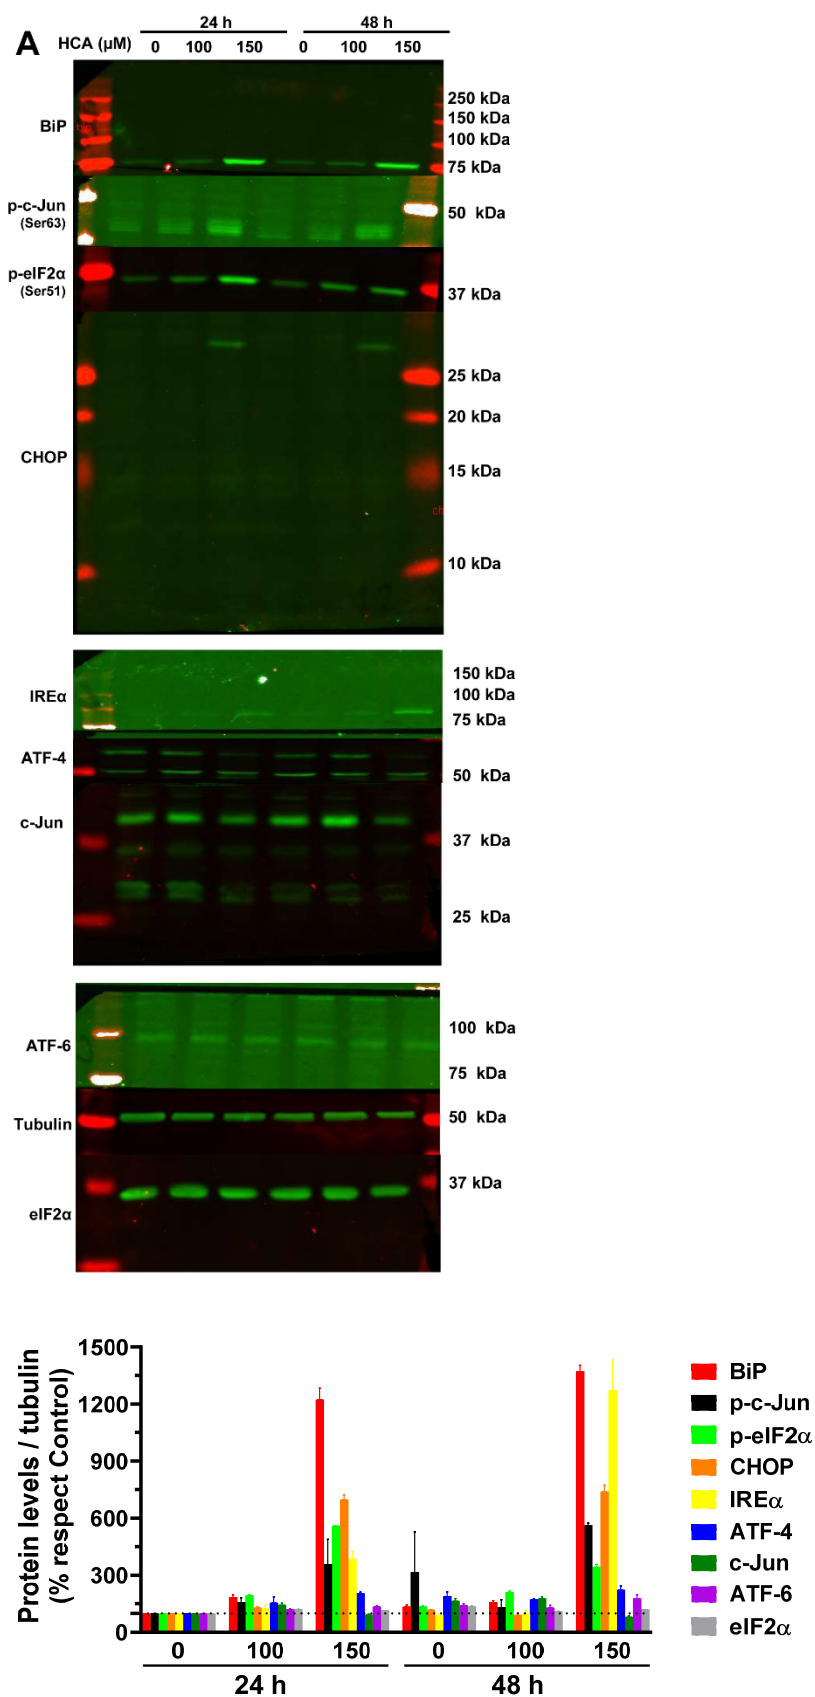

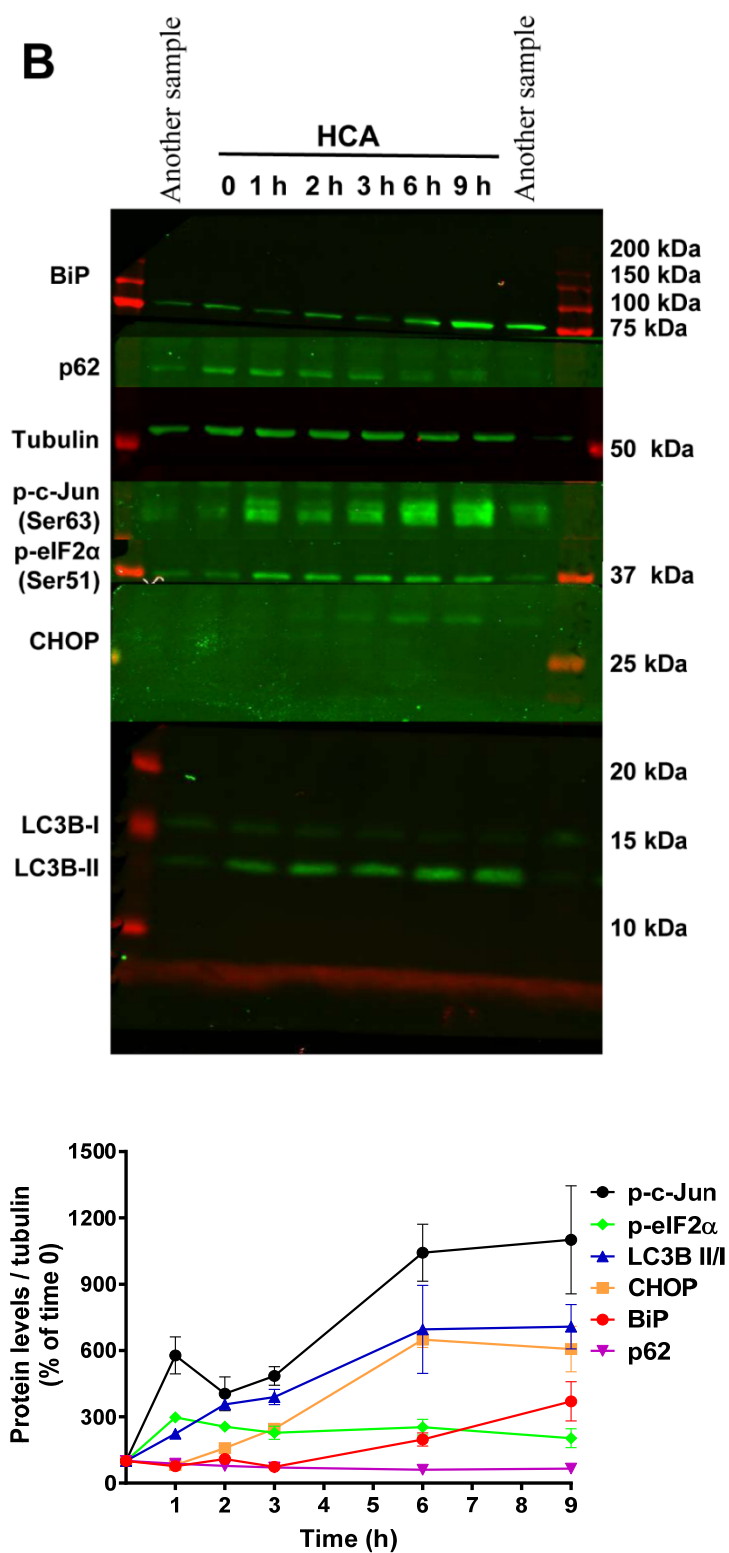

Figure 2.

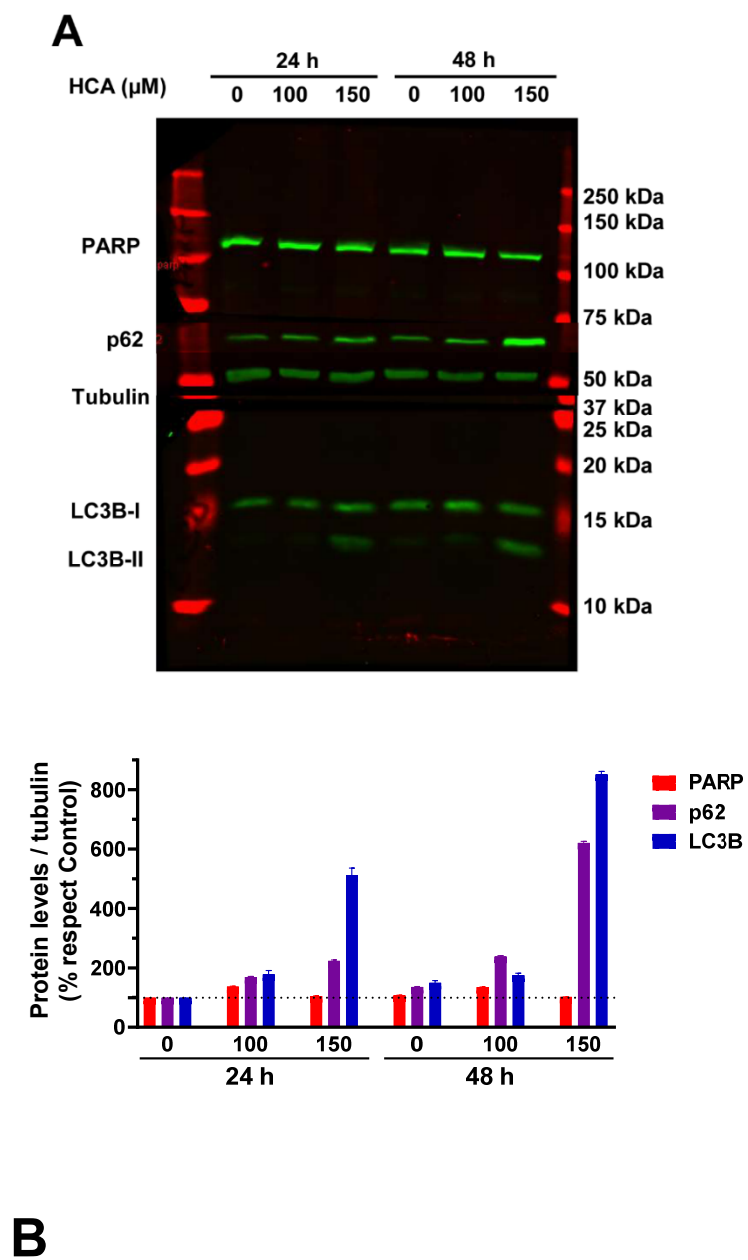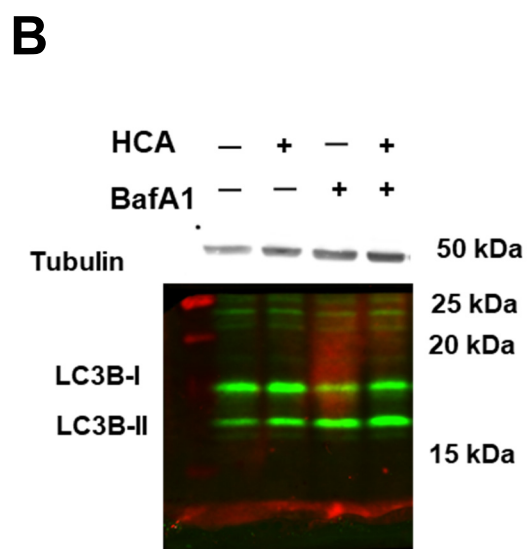

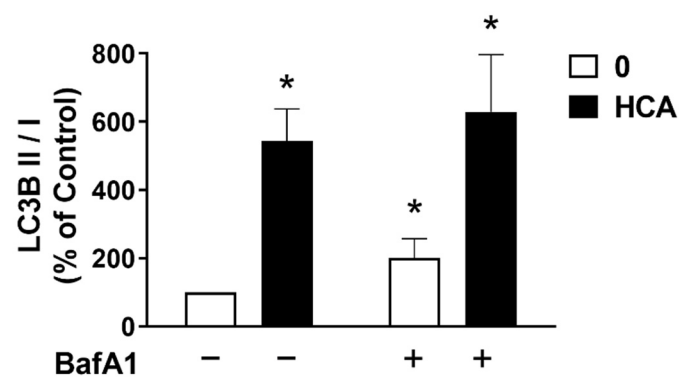

Figure 3.

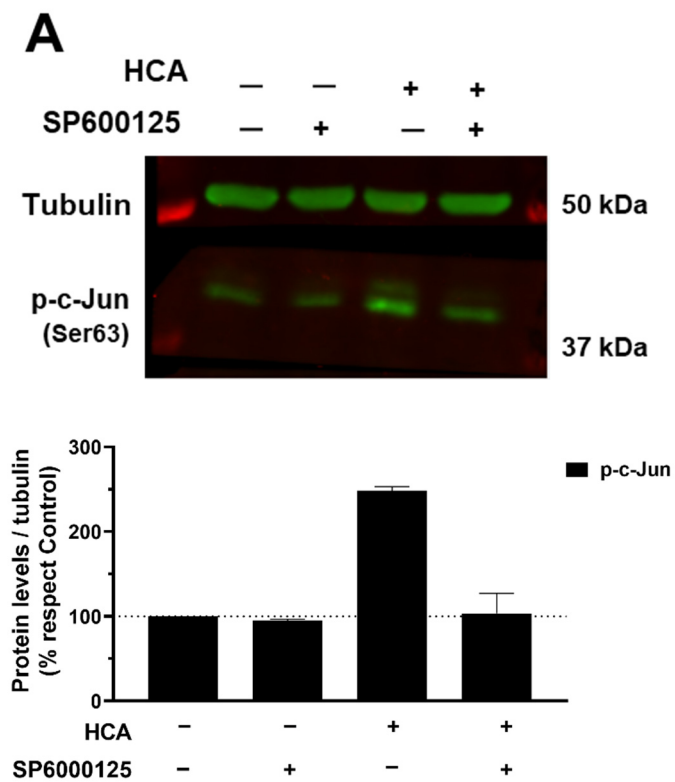



|          | 1 h |   |   |   | 6 h |   |   |   |
|----------|-----|---|---|---|-----|---|---|---|
| HCA      | -   | - | + | + | -   | - | + | + |
| SP600125 | -   | + | - | + | -   | + | - | + |

  

Western blot analysis showing protein levels of BiP, Tubulin, p-c-Jun (Ser63), p-eIF2 $\alpha$  (Ser51), CHOP, LC3B-I, and LC3B-II under various conditions. Molecular weight markers are indicated on the right.

- BiP: 200 kDa, 150 kDa, 100 kDa, 75 kDa
- Tubulin: 50 kDa
- p-c-Jun (Ser63)
- p-eIF2 $\alpha$  (Ser51): 37 kDa
- CHOP: 25 kDa, 20 kDa
- LC3B-I: 15 kDa
- LC3B-II: 10 kDa

  

Bar graph showing protein levels relative to tubulin (% respect Control) for BiP, p-c-Jun, p-eIF2 $\alpha$ , CHOP, and LC3B across different HCA and SP600125 treatments at 1h and 6h.

Protein levels / tubulin (% respect Control)

Legend:

- BiP (Red)
- p-c-Jun (Black)
- p-eIF2 $\alpha$  (Green)
- CHOP (Orange)
- LC3B (Blue)

|          | 1 h |   |   |   | 6 h |   |   |   |
|----------|-----|---|---|---|-----|---|---|---|
| HCA      | -   | - | + | + | -   | - | + | + |
| SP600125 | -   | + | - | + | -   | + | - | + |

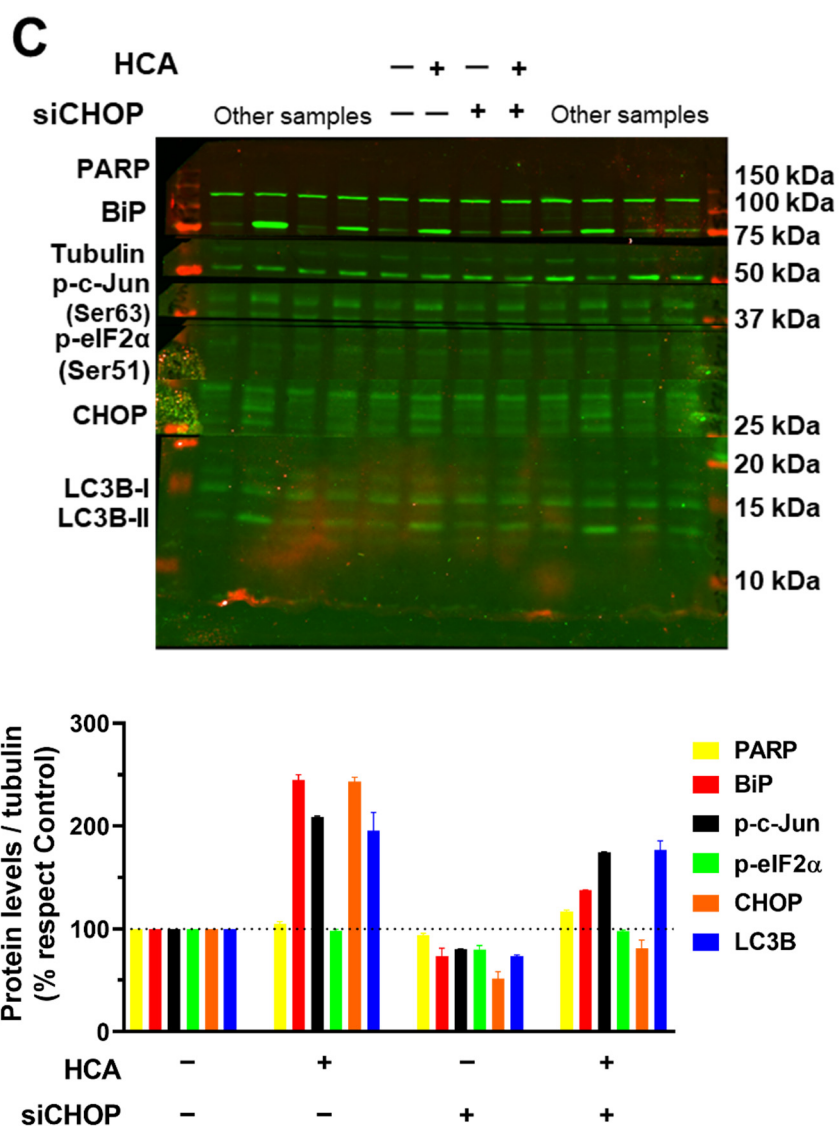

Figure 4.

**A**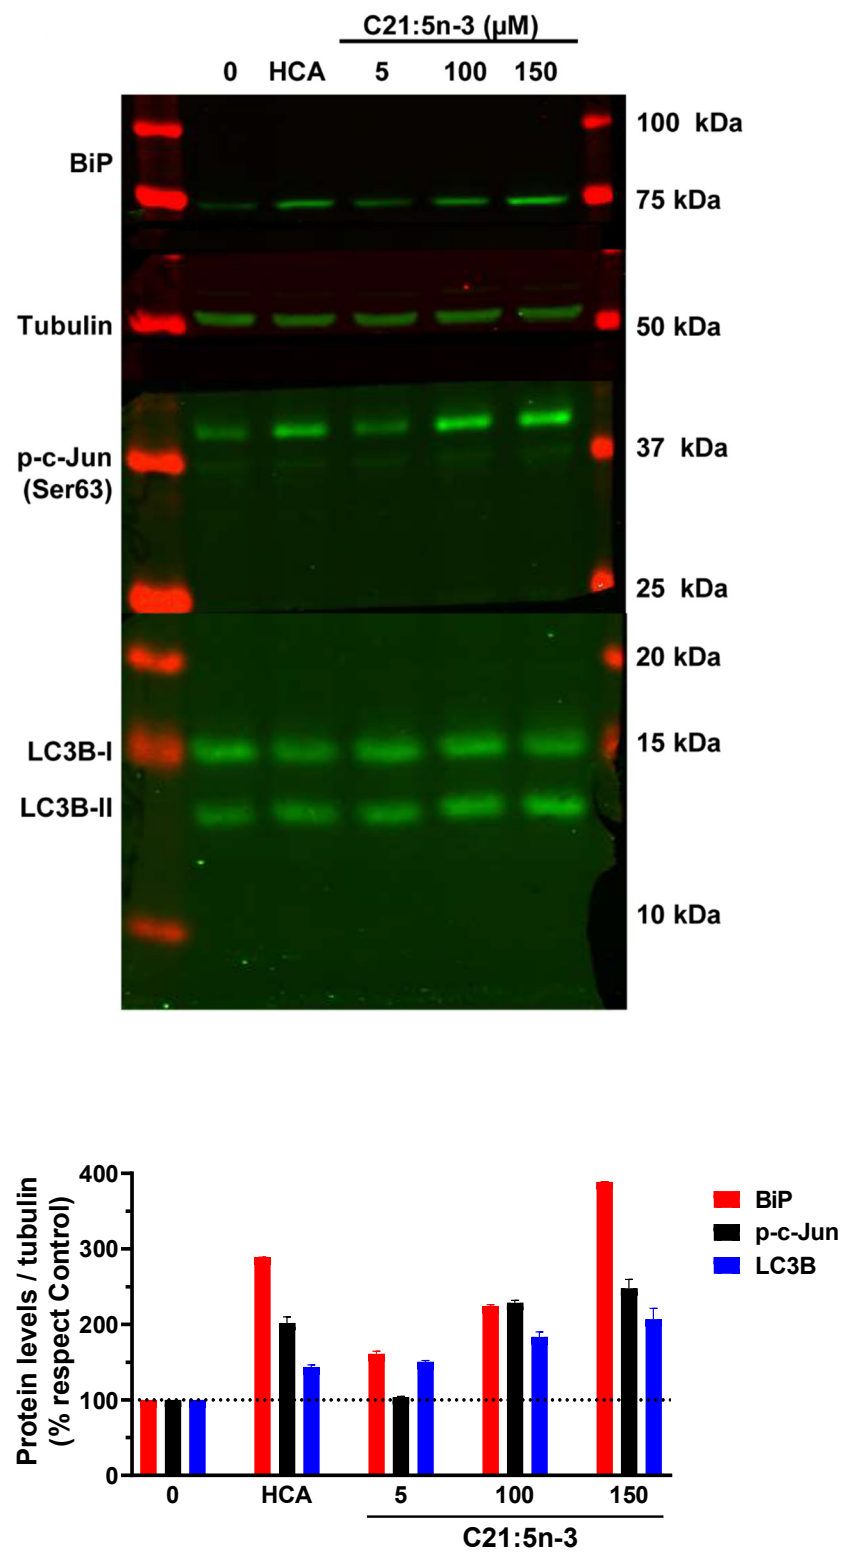

Figure 6.

**A**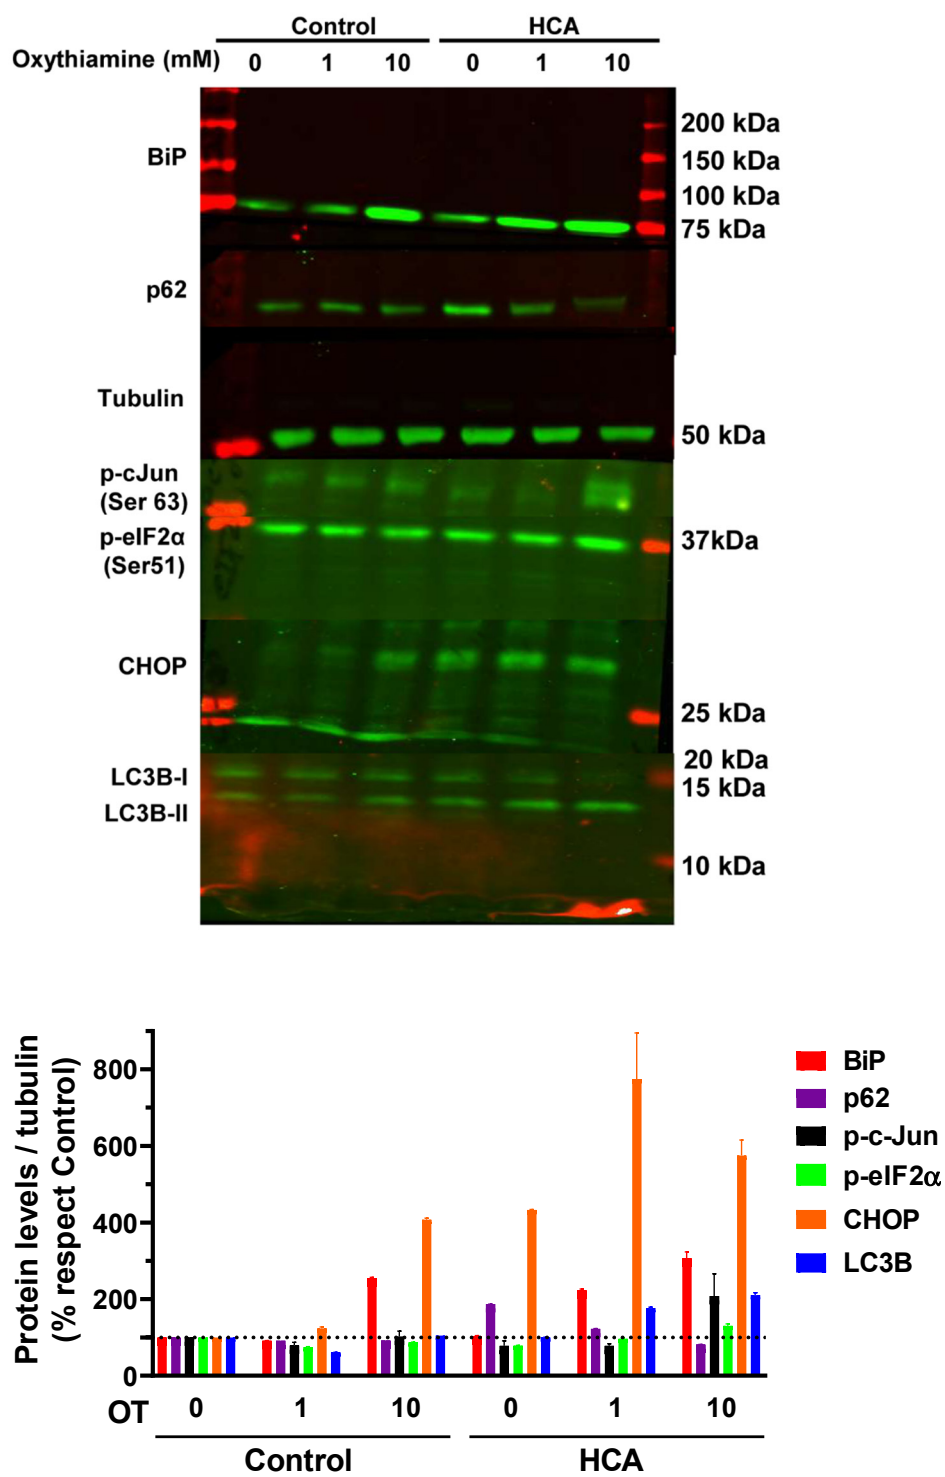

Figure 7.

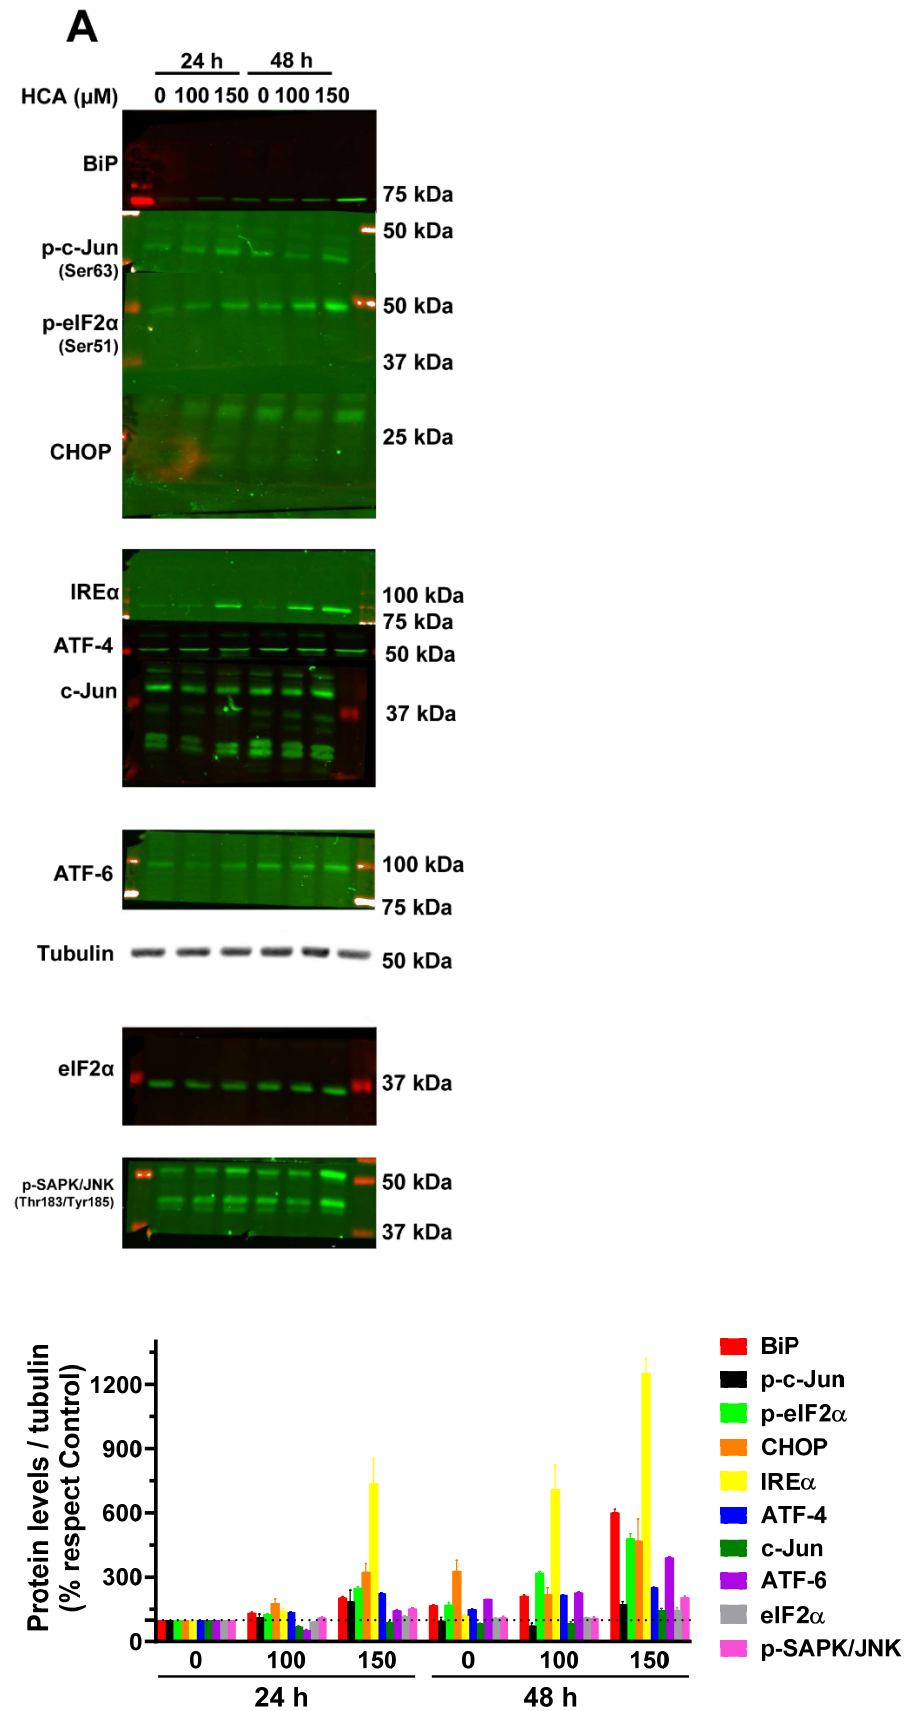

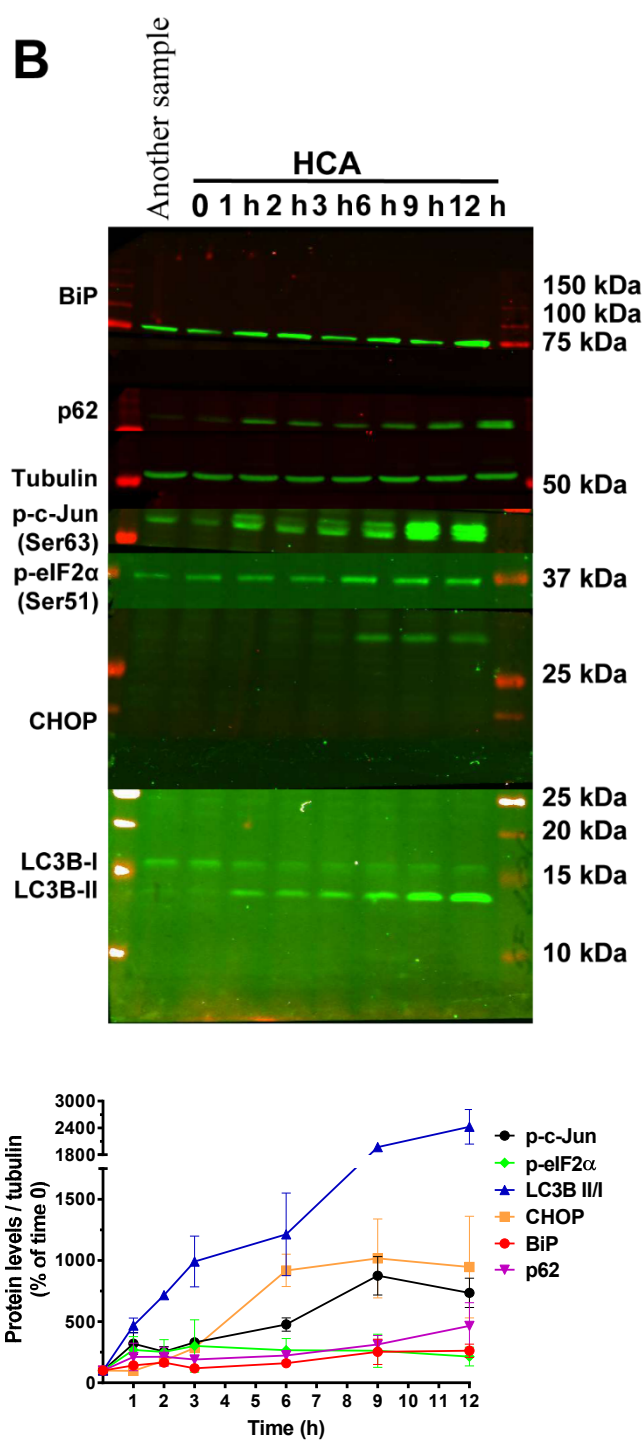

Figure S2.

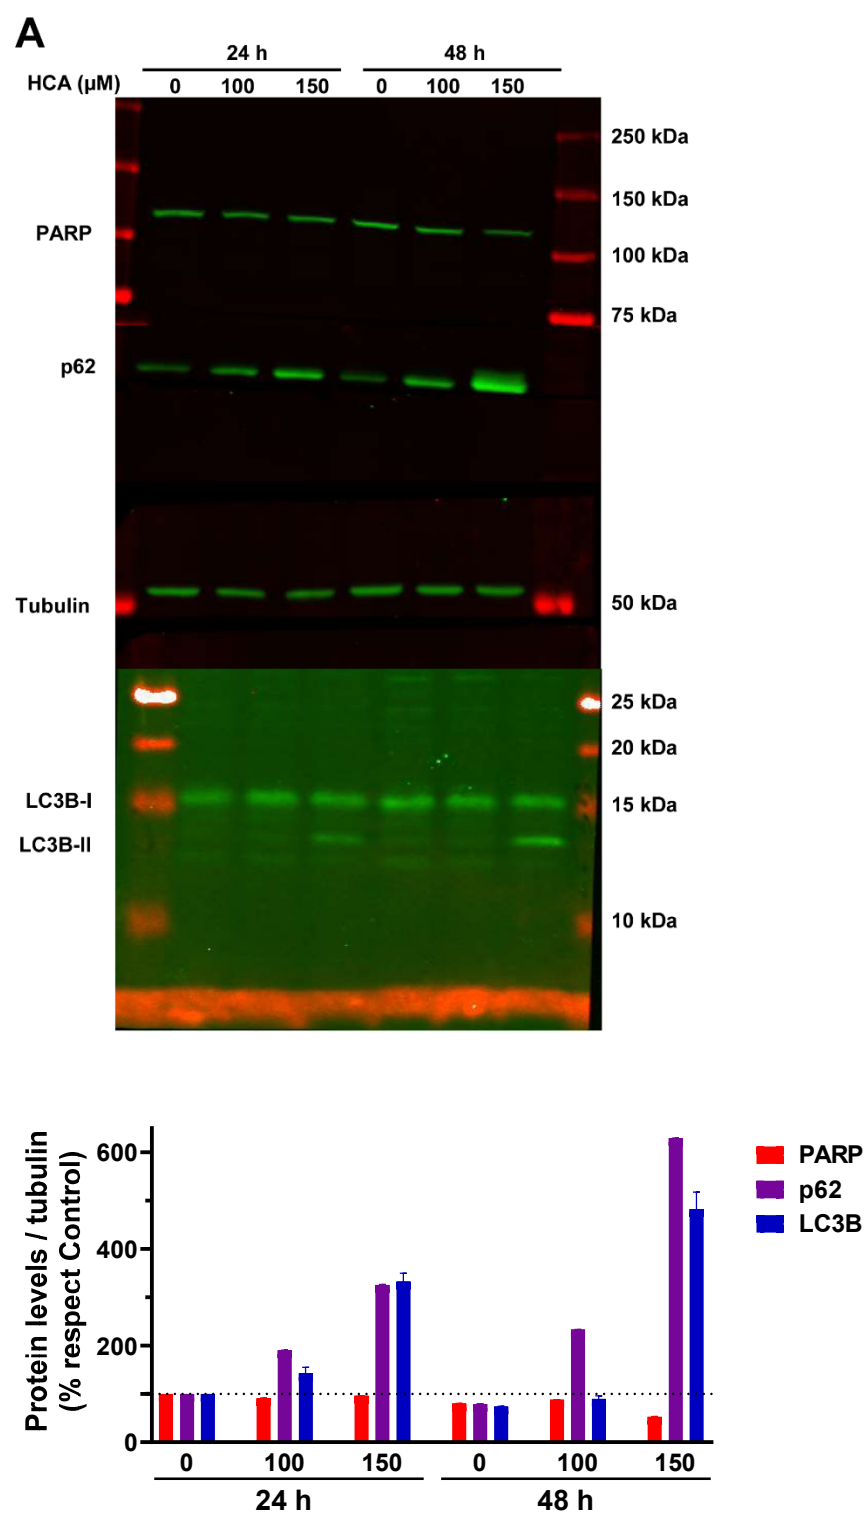

Figure S3.

**Figure S5.** Densitometric analysis of western blot results presented in Figure 2, Figure 3, Figure 4, Figure 6, Figure 7, Figure S2 and Figure S3. Western blots were normalized to  $\alpha$ -tubulin and densitometric analysis was performed using image processing software. Values are mean  $\pm$  standard error of the mean of independent experiments and values in the treated cells were considered relative to those of the untreated control cells. Student's t-test:  $*p < 0.05$  with respect to the controls. BafA1: bafilomycin; HCA: 2-hydroxycer-vonic acid; OT: oxythiamine; SP600125: JNK (C-Jun N-Terminal Kinase 1) inhibitor; C21:5n-3: heneicosapentaenoic acid; ATF:

---

Activating Transcription Factor; BiP: a.k.a. GRP78, glucose-regulated protein 78; CHOP: a.k.a. DDIT3, DNA Damage Inducible Transcript 3; c-Jun: Jun Proto-Oncogene, AP-1 Transcription Factor Subunit; eIF2a: Eukaryotic Translation Initiation Factor 2A; IRE $\alpha$ : inositol-requiring enzyme 1; LC3B: a.k.a. ATG8F, Microtubule Associated Protein 1 Light Chain 3 Beta; p62: a.k.a. SQSTM1, Sequestosome 1; PARP: Poly(ADP-Ribose) SAPK/JNK: Polymerase; Stress-activated protein kinases/Jun amino-terminal kinases; + : presence of the drug indicated in the figure; – : absence of the drug indicated in the figure.
